# Supplementary material
Source: publisher site journal article supplement (https://www.spandidos-publications.com/2061/downloadSupplementary)

Figure S1. Sensitivity of MCF-7 and HCT116 cells to GA-13315, irinotecan and cisplatin, before and after chronic GA-13315 exposure. (A-C) Viability curves of GA13315, CPT-11 and DDP, respectively, on HCT-116 pertaining to the chemosensitivity to chronic exposure of different concentrations of GA-13315. (D-F) Viability curves of GA13315, CPT-11 and DDP, respectively, on MCF-7 pertaining to the chemosensitivity to chronic exposure of different concentrations of GA-13315.

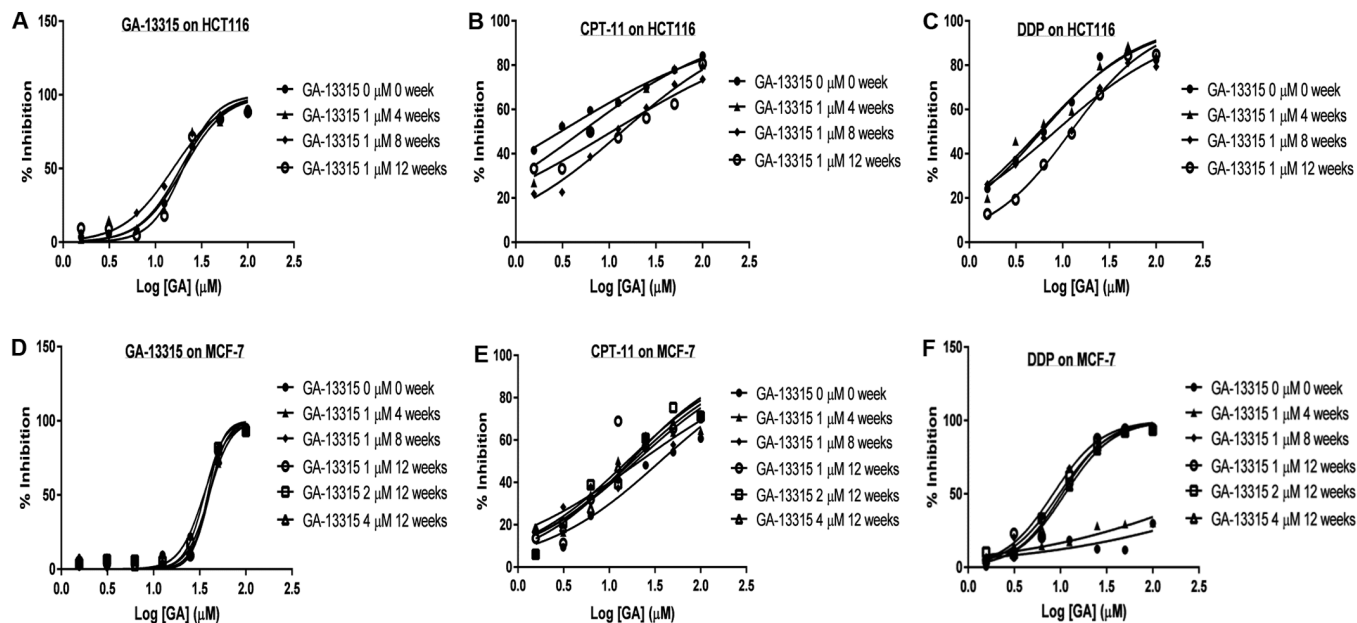

Supplement: Supplementary file 1 [file downloadSupplementary]
